# Supplementary material for: Effects of atmospheric CO 2 variability of the past 800 ka on the biomes of Southeast Africa
Source: Copernicus journal article supplement (doi:10.5194/cp-2019-18), 2019-02-20
Supplement: Supplementary file 1 [file Dupont et al MD96-2048 Supplementary Figures.pdf › Dupont et al MD96-2048 Supplementary Figures.pdf]

# Effects of atmospheric CO<sub>2</sub> variability of the past 800 ka on the biomes of Southeast Africa

Lydie M. Dupont, Thibaut Caley, Isla S. Castañeda

## Supplementary Figures

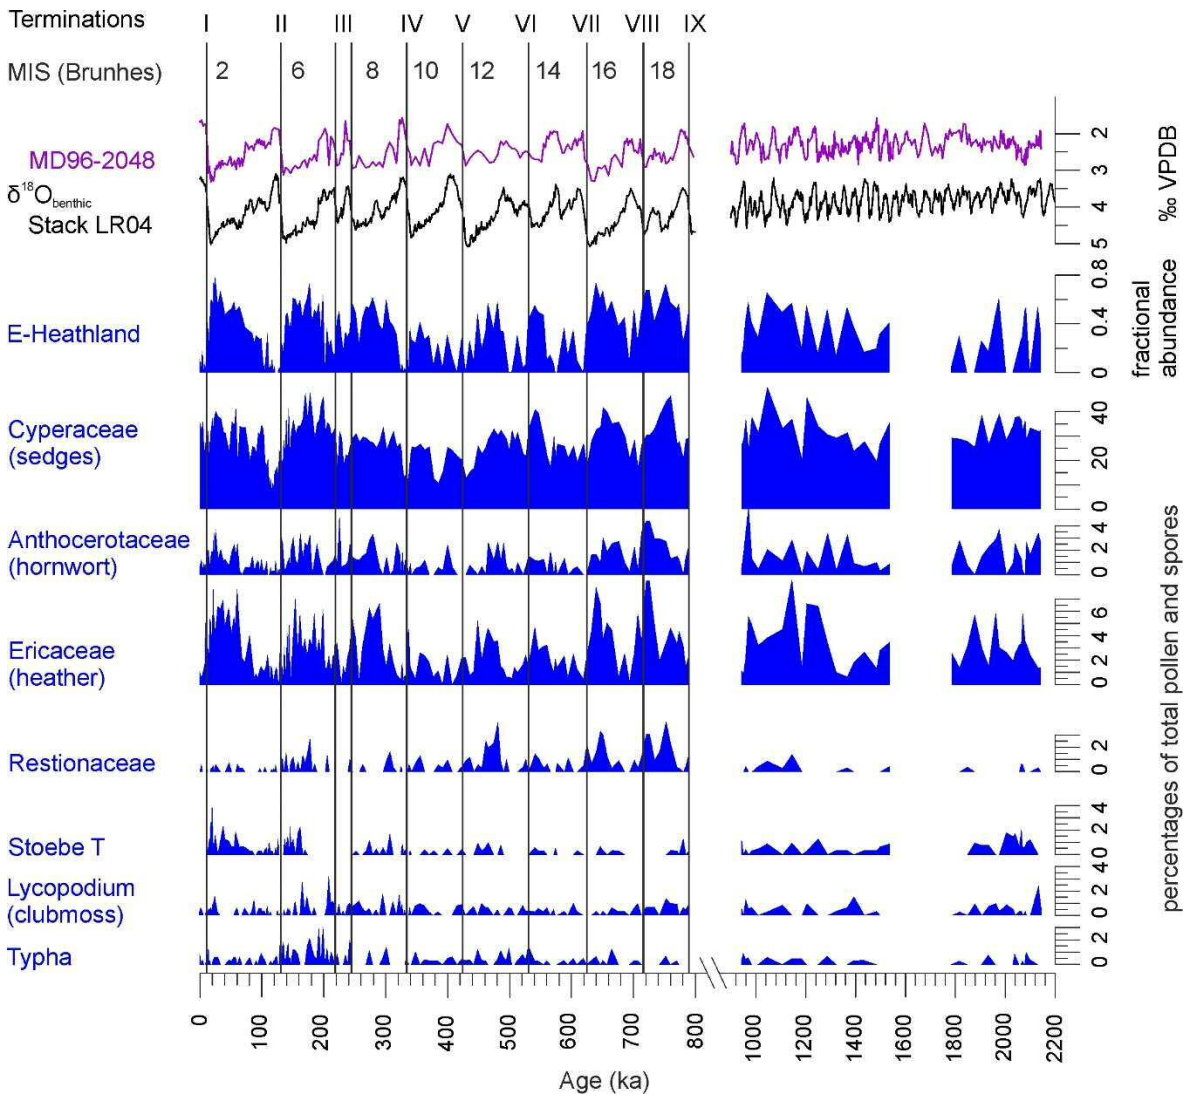

5

**Supplementary Figure 1. Endmember assemblage scores and selected pollen taxa for E-Heathland (filled curves) against age in ka. On top Terminations and even-numbered marine isotope stages (MIS) of the Brunhes Chron are indicated. Stable oxygen isotopes of benthic foraminifers of Core MD96-2048 (violet line) and of global stack LR04 (black line, Lisiecki & Raymo 2005).**

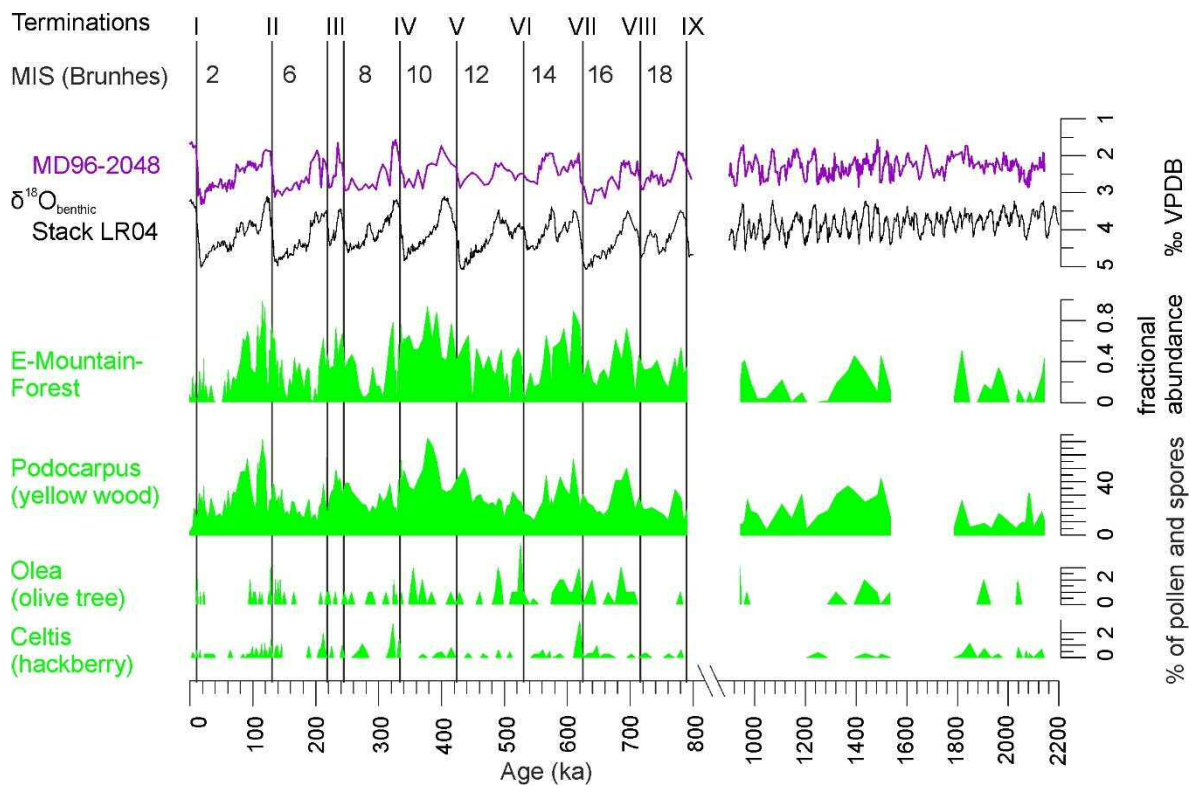

**Supplementary Figure 2. Endmember assemblage scores and selected pollen taxa for E-Mountain-Forest (filled curves) against age in ka. On top Terminations and even-numbered marine isotope stages (MIS) of the Brunhes Chron are indicated. Stable oxygen isotopes of benthic foraminifers of Core MD96-2048 (violet line) and of global stack LR04 (black line, Lisiecki & Raymo 2005).**

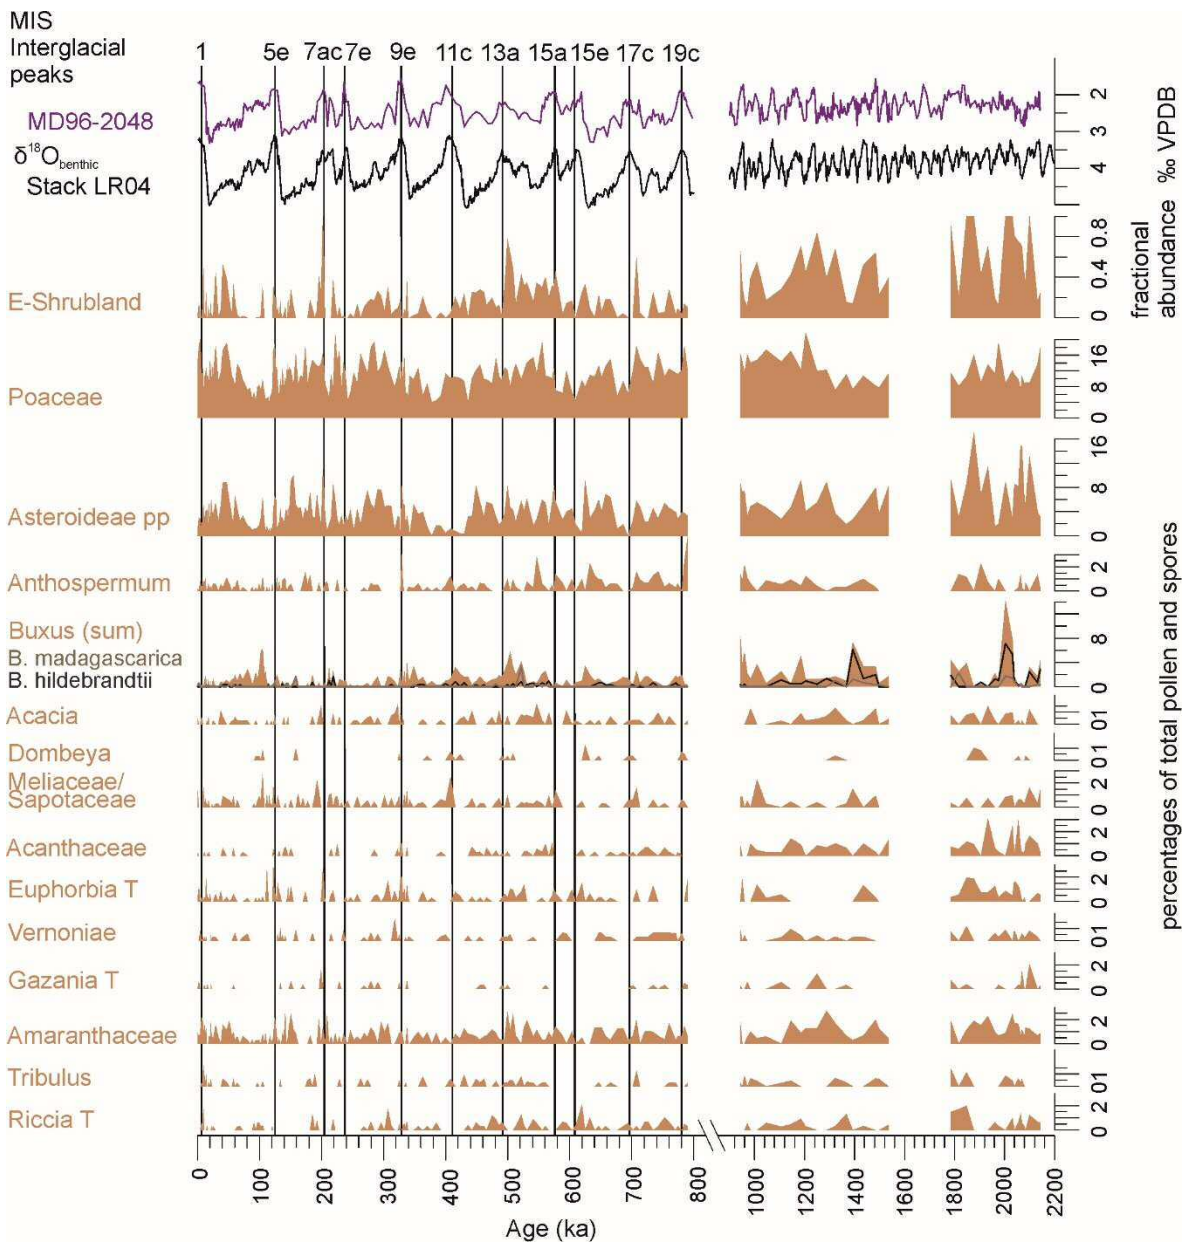

**Supplementary Figure 3. Endmember assemblage scores and selected pollen taxa for E-Shrubland (filled curves) against age in ka. On top Terminations and even-numbered marine isotope stages (MIS) of the Brunhes Chron are indicated. Stable oxygen isotopes of benthic foraminifers of Core MD96-2048 (violet line) and of global stack LR04 (black line, Lisiecki & Raymo 2005).**

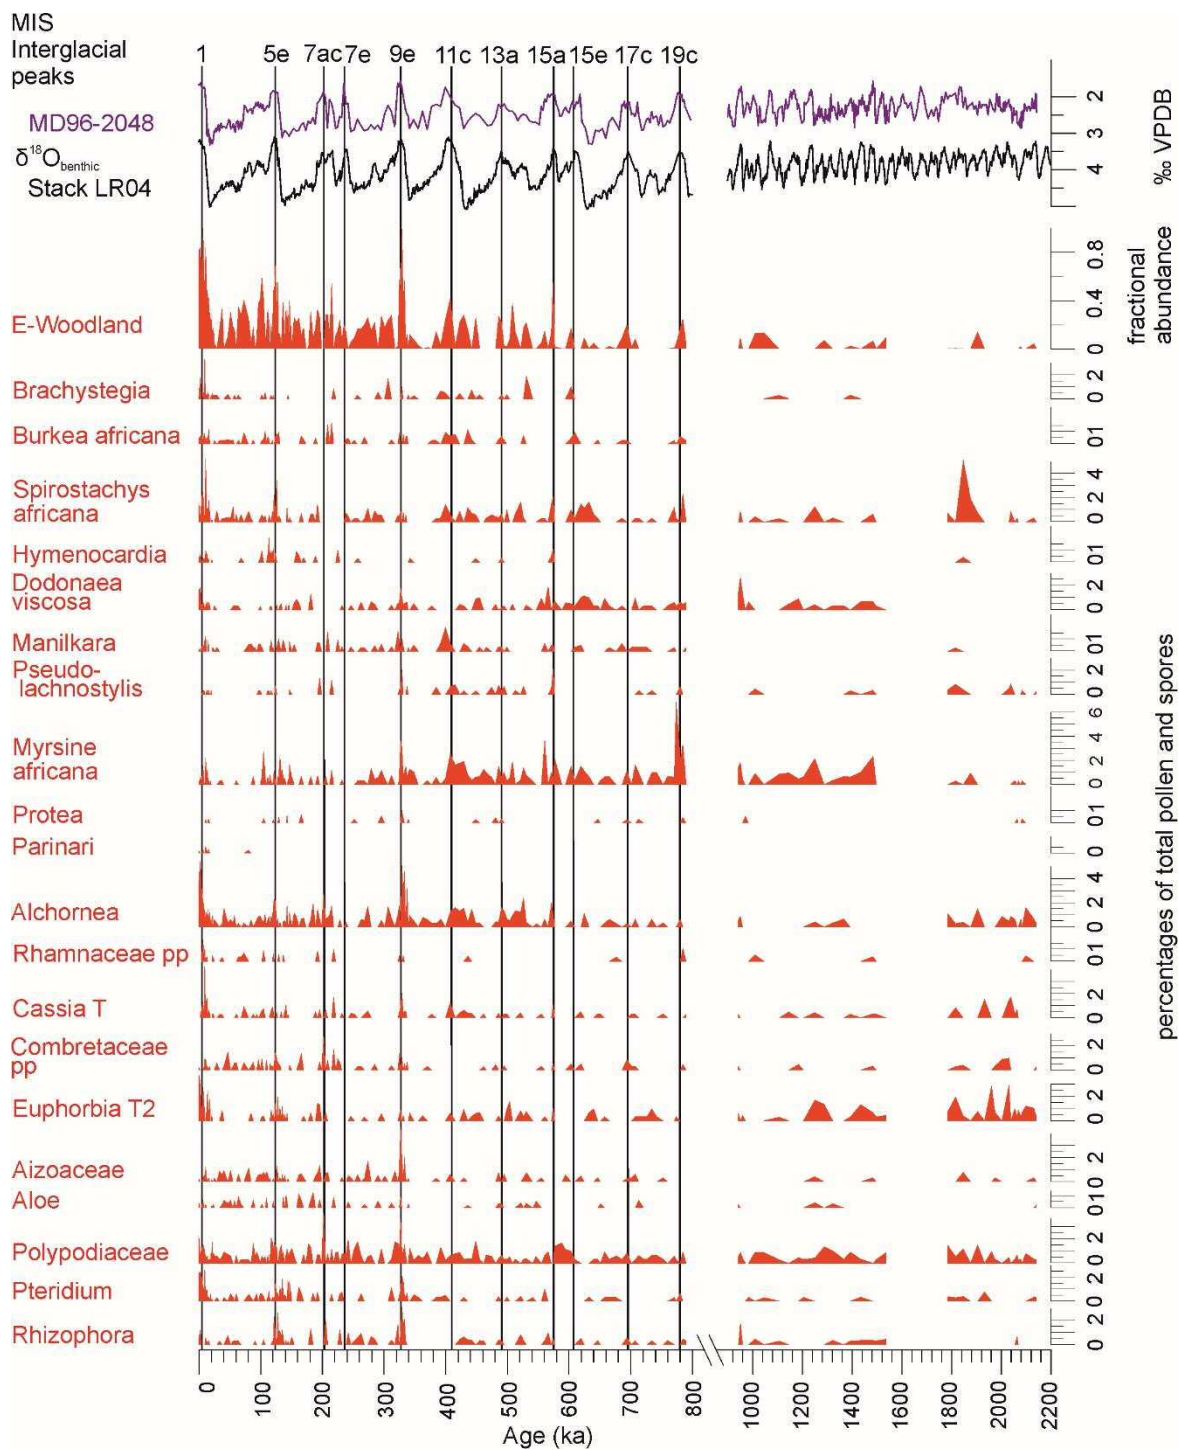

**Supplementary Figure 4.** Endmember assemblage scores and selected pollen taxa for E-Woodland (filled curves) against age in ka. On top Terminations and even-numbered marine isotope stages (MIS) of the Brunhes Chron are indicated. Stable oxygen isotopes of benthic foraminifers of Core MD96-2048 (violet line) and of global stack LR04 (black line, Lisiecki & Raymo 2005).
