# Supplementary material for: Effects of atmospheric CO 2 variability of the past 800 ka on the biomes of Southeast Africa
Source: Copernicus journal article supplement (doi:10.5194/cp-2019-18), 2019-02-20
Supplement: Supplementary file 1 [file Supplementary Tabels.xlsx]

## Sheet: STable 1 Taxa list
family	pollen taxon	group	growth form	assemblage score
SPORES
Anemiaceae	Anemia type	mountainous	fern	Heathland
Dennstaedtiaceae	Pteridium type		fern	Woodland
Lycopodiaceae	Lycopodium cernuum type	mountainous	fern	Heathland
Lycopodiaceae	Lycopodium pp	mountainous	fern	Heathland
Polypodiaceae	Polypodiaceae	forest	fern	Woodland
Pteridaceae	Pteris	riparian & swamps	fern	Woodland
Pteridophyta	monolete psilate spores		fern	Woodland
Pteridophyta	monolete spores		fern	Mountain Forest
Pteridophyta	trilete spores		fern	not significant
Anthocerotaceae	Anthoceros	mountainous	hornwort	Heathland
Anthocerotaceae	Phaeoceros	mountainous	hornwort	Heathland
Ricciaceae	Riccia type		moss	Shrubland
POLLEN
Acanthaceae	Acanthaceae pp	woodland	both	Shrubland
Acanthaceae	Avicennia	mangrove	arboreal	not analysed
Acanthaceae	Hypoestes-Dicliptera type	woodland	both	Shrubland
Acanthaceae	Justicia type		both	Shrubland
Acanthaceae	Petalidium		non-arboreal	not analysed
Aizoaceae	Aizoaceae	coastal	both	Woodland
Amaranthaceae	Amaranthaceae	halophil	both	Shrubland
Anacardiaceae	Lannea type	woodland	arboreal	Woodland
Anacardiaceae	Rhus type	woodland	arboreal	not significant
Anacardiaceae	Sorindeia juglanifolia type	woodland	arboreal	not significant
Apocynaceae	Rauvolfia caffra	riparian & swamps	arboreal	not analysed
Apocynaceae	Strophanthus	woodland	arboreal	not analysed
Aquifoliaceae	Ilex mitis	forest	arboreal	not significant
Araliaceae	Cussonia	forest	arboreal	not analysed
Araliaceae	Schefflera	mountainous	arboreal	not analysed
Arecaceae	Borassus	riparian & swamps	arboreal	not significant
Arecaceae	Calamus	forest	non-arboreal	not analysed
Arecaceae	cf Laccosperma	forest	arboreal	not analysed
Arecaceae	Elaeis guineensis	woodland	arboreal	not significant
Arecaceae	Hyphaene	woodland	arboreal	Shrubland
Arecaceae	Nypa	mangrove	non-arboreal	not analysed
Arecaceae	Phoenix	riparian & swamps	arboreal	not significant
Arecaceae	Raphia type	coastal	arboreal	not significant
Asperagaceae	Dracaena	woodland	arboreal	not significant
Asteraceae	Asteraceae Liguliflorae		both	not significant
Asteraceae	Asteraceae Tubuliflorae		both	Shrubland
Asteraceae	Asteraceae Vernoniae		both	Shrubland
Asteraceae	Centaurea	woodland	arboreal	Shrubland
Asteraceae	Cotula type		non-arboreal	Shrubland
Asteraceae	Daisy type		non-arboreal	Shrubland
Asteraceae	Gazania type	halophil	both	Shrubland
Asteraceae	Pentzia type		non-arboreal	Shrubland
Asteraceae	Stoebe type	mountainous	arboreal	Heathland
Asteraceae	Tarchonanthus-Artemisia type	woodland	arboreal	Woodland
Balsamicaceae	Impatiens	forest	non-arboreal	not analysed
Basellaceae	Basella		both	not analysed
Bignoniaceae	Kigelia africana	woodland	arboreal	not analysed
Bignoniaceae	Markhamia	woodland	arboreal	not analysed
Bignoniaceae	Stereospermum	woodland	arboreal	not significant
Boraginaceae	Cordia	woodland	arboreal	not analysed
Brassicaceae	Brassicaceae		non-arboreal	not analysed
Burseraceae	Canarium	woodland	arboreal	not significant
Burseraceae	Commiphora	coastal	arboreal	Shrubland
Buxaceae	Buxus hildebrandtii type	forest	arboreal	Shrubland
Buxaceae	Buxus macowani type	forest	arboreal	Shrubland
Buxaceae	Buxus madagascaria type	forest	arboreal	Shrubland
Campanulaceae	Campanulaceae	riparian & swamps	non-arboreal	not significant
Campanulaceae	Lobelia	mountainous	non-arboreal	not analysed
Cannabaceae	Celtis	woodland	arboreal	Mountain forest
Capparaceae	Boscia-Maerua type	coastal	arboreal	Shrubland
Capparaceae	Capparis	mountainous	arboreal	not analysed
Capparaceae	Cleome	woodland	non-arboreal	Shrubland
Caprifoliaceae	Scabiosa-Cephalaria type	riparian & swamps	non-arboreal	Mountain forest
Caryophyllaceae	Caryophyllaceae	coastal	both	Woodland
Caryophyllaceae	Polycarpaea	coastal	non-arboreal	not analysed
Caryophyllaceae	Polycarpon		non-arboreal	not analysed
Casuarinaceae	Casuarina	woodland	arboreal	Mountain forest
Celastraceae	Celastraceae	forest	arboreal	Shrubland
cf Solanaceae	Type stephanocolporate, striatoreticulate		both	Mountain forest
Chrysobalanaceae	Parinari	woodland	arboreal	Woodland
Clusiaceae	Allanblackia	forest	arboreal	not analysed
Clusiaceae	Garcinia ovalifolia type	forest	arboreal	Woodland
Combretaceae	Combretaceae pp	woodland	arboreal	Woodland
Combretaceae	Lumnitzera type	mangrove	arboreal	Shrubland
Commelinaceae	Commelinaceae		non-arboreal	not significant
Connaraceae	Cnestis type		arboreal	Mountain forest
Convolvulaceae	Ipomoea		both	not analysed
Convolvulaceae	Merremia-Hildebrandtia type		both	not analysed
Convolvulaceae	Seddera-Evolvulus type	forest	both	not significant
Cucurbitaceae	Coccinia	woodland	non-arboreal	not analysed
Cucurbitaceae	Cucumis		non-arboreal	not analysed
Cucurbitaceae	Luffa	woodland	non-arboreal	not analysed
Cupressaceae	Juniperus	mountainous	arboreal	Woodland
Cyperaceae	Cyperaceae		non-arboreal	Heathland
Droseraceae	Drosera	riparian & swamps	non-arboreal	not analysed
Ebenaceae	Diospyros	woodland	arboreal	not significant
Ebenaceae	Euclea	woodland	arboreal	not significant
Ericaceae	Ericaceae	mountainous	arboreal	Heathland
Eriocaulaceae	Eriocaulon	riparian & swamps	non-arboreal	not analysed
Euphorbiaceae	Acalypha	forest	both	not analysed
Euphorbiaceae	Alchornea	forest	arboreal	Woodland
Euphorbiaceae	Caperonia type		non-arboreal	not analysed
Euphorbiaceae	Croton	woodland	both	not significant
Euphorbiaceae	Dichostemma-Anthostema type	forest	arboreal	not analysed
Euphorbiaceae	Euphorbia type	woodland	both	Shrubland
Euphorbiaceae	Euphorbia type 2		both	Woodland
Euphorbiaceae	Klaineanthus	woodland	arboreal	Heathland
Euphorbiaceae	Macaranga	forest	arboreal	not significant
Euphorbiaceae	Spirostachys	woodland	arboreal	Woodland
Fabaceae	Afzelia	woodland	arboreal	not analysed
Fabaceae	Berlinia type	woodland	arboreal	not analysed
Fabaceae	Brachystegia	woodland	arboreal	Woodland
Fabaceae	Burkea africana	woodland	arboreal	Woodland
Fabaceae	Caesalpiniaceae pp	woodland	both	not analysed
Fabaceae	Cassia type	woodland	both	Woodland
Fabaceae	Colophospermum mopane	woodland	arboreal	Shrubland
Fabaceae	Daniellia type	woodland	arboreal	Woodland
Fabaceae	Fabaceae pp	woodland	both	Woodland
Fabaceae	Peltophorum africanum	woodland	arboreal	Shrubland
Fabaceae	Piliostigma cf reticulatum	woodland	arboreal	not analysed
Fabaceae	Tamarindus	woodland	arboreal	not analysed
Fabaceae-Detarieae	Cynometra	woodland	arboreal	not significant
Fabaceae-Detarieae	Detarium	woodland	arboreal	not analysed
Fabaceae-Dialieae	Dialium	coastal	arboreal	not significant
Fabaceae-Faboideae	Baphia	forest	arboreal	Woodland
Fabaceae-Faboideae	Crotalaria	forest	both	Mountain forest
Fabaceae-Faboideae	Erythrina	woodland	non-arboreal	not analysed
Fabaceae-Faboideae	Indigofera type	woodland	both	Woodland
Fabaceae-Faboideae	Millettia	forest	arboreal	Woodland
Fabaceae-Faboideae	Ormocarpum	woodland	arboreal	not analysed
Fabaceae-Faboideae	Pericopsis	forest	arboreal	Shrubland
Fabaceae-Faboideae	Philenoptera type	woodland	arboreal	not significant
Fabaceae-Faboideae	Pterocarpus type	woodland	arboreal	Woodland
Fabaceae-Faboideae	Rhynchosia	woodland	non-arboreal	Shrubland
Fabaceae-Faboideae	Tephrosia type	woodland	both	not significant
Fabaceae-Faboideae	Vigna		both	not analysed
Fabaceae-Mimosoideae	Acacia	woodland	arboreal	Shrubland
Fabaceae-Mimosoideae	Mimosaceae pp	woodland	arboreal	not analysed
Fabaceae-Mimosoideae	Piptadeniastrum-Entada type	forest	arboreal	not analysed
Flagellariaceae	Flagellaria	forest	non-arboreal	not analysed
Gentianaceae	Anthocleista	riparian & swamps	arboreal	not analysed
Geraniaceae	Pelargonium type		non-arboreal	Shrubland
Gunneraceae	Gunnera	riparian & swamps	non-arboreal	not significant
Haloragaceae	Myriophyllum	riparian & swamps	non-arboreal	not analysed
Lamiaceae	Leonotis		non-arboreal	not analysed
Lamiaceae	Ocimum type	mountainous	non-arboreal	not significant
Lecythidaceae	Barringtonia	forest	arboreal	not analysed
Liliaceae	Liliaceae		non-arboreal	Shrubland
Loganiaceae	Strychnos	woodland	arboreal	not analysed
Loranthaceae	Plicosepalus	woodland	arboreal	not analysed
Loranthaceae	Tapinanthus	woodland	arboreal	not significant
Lythraceae	Ammannia		non-arboreal	not analysed
Malpighiaceae	Flabellaria		both	not analysed
Malvaceae	Corchorus		both	Shrubland
Malvaceae	Dombeya	woodland	arboreal	Shrubland
Malvaceae	Grewia	woodland	arboreal	not significant
Malvaceae	Heritiera type		arboreal	not analysed
Malvaceae	Hermannia	halophil	non-arboreal	not analysed
Malvaceae	Melochia	woodland	both	not analysed
Malvaceae	Sterculia	woodland	arboreal	not analysed
Malvaceae	Waltheria		both	not analysed
Meliaceae	Khaya	forest	arboreal	Woodland
Meliaceae-Sapotaceae	Meliaceae-Sapotaceae	forest	arboreal	Shrubland
Moraceae	Moraceae	woodland	both	not analysed
Myricaceae	Morella	mountainous	arboreal	not significant
Myristicaceae	Cephalosphaera	woodland	arboreal	not analysed
Myristicaceae	Pycnanthus	forest	arboreal	Shrubland
Myrtaceae	Eugenia	coastal	arboreal	not analysed
Neuradaceae	Neuradaceae		non-arboreal	not analysed
Nyctaginaceae	Nyctaginaceae	forest	both	not significant
Nymphaeaceae	Nymphaea	riparian & swamps	non-arboreal	not analysed
Ochnaceae	Lophira	forest	arboreal	not significant
Oleaceae	Olea	mountainous	arboreal	Mountain forest
Oleaceae	Schrebera type	woodland	arboreal	Woodland
Onagraceae	Ludwigia	riparian & swamps	non-arboreal	not analysed
Pandanaceae	Pandanus		arboreal	Shrubland
Passifloraceae	Adenia		both	not analysed
Peraceae	Clutia	mountainous	both	not analysed
Phyllanthaceae	Bridelia	woodland	arboreal	Mountain forest
Phyllanthaceae	Flueggea	woodland	arboreal	not analysed
Phyllanthaceae	Hymenocardia	forest	arboreal	Woodland
Phyllanthaceae	Phyllanthus		arboreal	not analysed
Phyllanthaceae	Pseudolachnostylis type	woodland	arboreal	Woodland
Phyllanthaceae	Uapaca	woodland	arboreal	not significant
Plantaginaceae	Plantago		non-arboreal	Woodland
Poaceae	Poaceae		non-arboreal	Shrubland
Podocarpaceae	Podocarpus	mountainous	arboreal	Mountain forest
Polygalaceae	Polygala		non-arboreal	not analysed
Polygonaceae	Oxygonum		non-arboreal	not analysed
Polygonaceae	Persicaria senegalensis type	riparian & swamps	non-arboreal	Shrubland
Polygonaceae	Polygonum aviculare type	riparian & swamps	non-arboreal	not analysed
Polygonaceae	Rumex	riparian & swamps	both	not analysed
Primulaceae	Myrsine africana	mountainous	arboreal	Woodland
Proteaceae	Protea type	mountainous	arboreal	Woodland
Ranunculaceae	Clematis type	woodland	arboreal	not significant
Restionaceae	Restionaceae pp	mountainous	non-arboreal	Heathland
Restionaceae	Restionaceae type perforations	mountainous	non-arboreal	Heathland
Rhamnaceae	Rhamnaceae pp	woodland	arboreal	Woodland
Rhamnaceae	Ziziphus type	coastal	arboreal	Shrubland
Rhizophoraceae	Rhizophoraceae	mangrove	arboreal	Woodland
Rosaceae	Alchemilla	mountainous	both	Shrubland
Rosaceae	Cliffortia	mountainous	arboreal	Shrubland
Rosaceae	Hagenia	mountainous	arboreal	not analysed
Rubiaceae	Anthospermum	mountainous	both	Shrubland
Rubiaceae	Canthium-Morelia type	woodland	arboreal	Mountain forest
Rubiaceae	Coffea type	woodland	arboreal	Woodland
Rubiaceae	Crossopteryx type	woodland	arboreal	not significant
Rubiaceae	Cuviera	woodland	arboreal	not analysed
Rubiaceae	Gaertnera	woodland	arboreal	not analysed
Rubiaceae	Galium	woodland	non-arboreal	not analysed
Rubiaceae	Kohautia	woodland	non-arboreal	not analysed
Rubiaceae	Mitracarpus	woodland	non-arboreal	not analysed
Rubiaceae	Mitragyna	woodland	arboreal	not analysed
Rubiaceae	Psychotria	forest	arboreal	not analysed
Rubiaceae	Psydrax	woodland	arboreal	not significant
Rubiaceae	Rubiaceae pp	woodland	both	not significant
Rubiaceae	Rytigynia-Fadogia type	coastal	both	Woodland
Rubiaceae	Spermacoce	woodland	both	Woodland
Rubiaceae	Stipularia africana	riparian & swamps	non-arboreal	Heathland
Rutaceae	Afraegle		arboreal	not analysed
Rutaceae	Zanthoxylum	forest	arboreal	Mountain forest
Sapindaceae	Allophylus	forest	arboreal	not analysed
Sapindaceae	Blighia type	forest	arboreal	Shrubland
Sapindaceae	Dodonaea viscosa	woodland	arboreal	Woodland
Sapotaceae	Chrysophyllum	forest	arboreal	Woodland
Sapotaceae	Manilkara	woodland	arboreal	Woodland
Scrophulariaceae	Scrophulariaceae	coastal	non-arboreal	not analysed
Solanaceae	Solanum		both	not significant
Thymelaeaceae	Passerina	mountainous	arboreal	Heathland
Thymelaeaceae	Thymelaeaceae pp	forest	both	not significant
Typhaceae	Typha	riparian & swamps	non-arboreal	Heathland
Urticaceae	Urticaceae	woodland	both	Mountain forest
Vitaceae	Cissus	woodland	both	not analysed
Vitaceae	Leea		arboreal	not analysed
Xanthorrhoeaceae	Aloe	mountainous	non-arboreal	Woodland
Zygophyllaceae	Balanites	woodland	arboreal	Shrubland
Zygophyllaceae	Fagonia	coastal	both	not analysed
Zygophyllaceae	Tribulus	halophil	non-arboreal	Shrubland
Zygophyllaceae	Zygophyllum	halophil	non-arboreal	Shrubland

## Sheet: Stable 2 EM scores
family	pollen taxon	group	growth form	E Heathland	E Shrubland	E Woodland	E Mountain Forest	r2		pollen taxon	EM1	EM2	EM3	r2	group
E-Mountain Forest										Past 350ka only, Dupont et al. 2011
Podocarpaceae	Podocarpus	mountainous	arboreal	14.0955	6.35396	22.2802	51.8324	0.605603
Pteridophyta	monolete spores		fern	0	1.66218	0.258695	2.37812	0.328267		EM1
Cannabaceae	Celtis	woodland	arboreal	0	0.102574	0.23036	0.489106	0.0697665		Podocarpus	52.187	18.0166	10.1432	0.660477
Oleaceae	Olea	mountainous	arboreal	0	0.356257	0.190085	0.44375	0.0541548		Myrsine africana	1.18506	0	1.1102	0.140805	mountainous herbs, scrubs and trees
Casuarinaceae	Casuarina	shore islands	arboreal	0.0146308	0	0	0.0986675	0.0394155		Buxus macowani type	1.93536	0	0.92771	0.11436	riparian and swamp plants
Connaraceae	Cnestis type		arboreal	0.0955293	0	0.0499665	0.100363	0.0358921		Celtis	0.697628	0	0.209677	0.107441	woodland trees and scrubs
cf Solanaceae	Type stephanocolporate, striatoreticulate		arboreal/non-arboreal	0	0.0577129	0.0147893	0.0921432	0.0356869		Hymenocardia	0.331285	0	0.204373	0.102305	forest trees
Fabaceae-Faboideae	Crotalaria	forest	arboreal/non-arboreal	0	0.0738648	0.0786484	0.0922993	0.0338913		Urticaceae	0.200285	0	0	0.0814302	woodland trees and scrubs
Rubiaceae	Canthium-Morelia type	woodland	arboreal	0	0.0619863	0	0.0968654	0.0332599		Peltophorum africanum	0.145625	0	0.066892	0.0641031	woodland trees and scrubs
Phyllanthaceae	Bridelia	woodland	arboreal	0	0	0.0498875	0.0691225	0.0326081		Polycarpaea	0.0999989	0	0.0596059	0.0508313	coastal and halophytic scrubs and herbs
Urticaceae	Urticaceae	woodland	arboreal/non-arboreal	0	0.127908	0.111627	0.156972	0.0317484		Anemiaceae	0.450818	0.384408	0	0.042462	forest trees
Rutaceae	Zanthoxylum	forest	arboreal	0	0	0.049151	0.0773717	0.0304365
Caprifoliaceae	Scabiosa-Cephalaria type	riparian & swamps	non-arboreal	0.0300173	0.0119888	0	0.0507397	0.0247112
E-Heathland										EM2
Ericaceae	Ericaceae	mountainous	arboreal	6.77822	2.813	1.32244	0	0.489803		Ericaceae	0.191755	6.23194	1.85406	0.469068	mountainous herbs, scrubs and trees
Cyperaceae	Cyperaceae		non-arboreal	42.9112	29.3325	23.33	15.254	0.463081		Cyperaceae	18.9751	42.373	28.2644	0.394043
Anthocerotaceae	Phaeoceros	mountainous	hornwort	2.49836	0.220212	0	0.492225	0.349623		Phaeoceros	0.713883	1.7919	0	0.301637	mountainous herbs, scrubs and trees
Thymelaeaceae	Passerina	mountainous	arboreal	0.778775	0.472698	0.184725	0	0.197733		Stoebe type	0	1.18113	0.155939	0.186621	mountainous herbs, scrubs and trees
Restionaceae	Restionaceae type perforations	mountainous	non-arboreal	0.955602	0	0	0.254199	0.171228		Passerina	0	0.800154	0.103717	0.17615	mountainous herbs, scrubs and trees
Asteraceae	Stoebe type	mountainous	arboreal	0.903724	0.556841	0.369858	0	0.133203		Daisy type	0.184671	1.18376	0.710027	0.101761	Asteraceae
Anthocerotaceae	Anthoceros	mountainous	hornwort	0.695404	0.278156	0.025203	0.146702	0.0976572		Buxus madagascaria type	0	0.160923	0.139288	0.0760205	forest trees
Restionaceae	Restionaceae pp	mountainous	non-arboreal	0.282308	0.156422	0	0.042411	0.0414245		Uapaca	0.0806792	0.39531	0.20252	0.054578	woodland trees and scrubs
Typhaceae	Typha	riparian & swamps	non-arboreal	0.55307	0.219105	0.391889	0.251042	0.0401257		Typha	0.261347	0.834368	0.273578	0.051454	riparian and swamp plants
Lycopodiaceae	Lycopodium cernuum type	mountainous	fern	0.182256	0.111304	0	0.101021	0.0334534		Lycopodium cernuum type	0.0400846	0.144042	0	0.0467827	mountainous herbs, scrubs and trees
Euphorbiaceae	Klaineanthus	woodland	arboreal	0.0893309	0	0.00241179	0	0.0324914		Restionaceae	0.148936	0.524325	0	0.0464967	mountainous herbs, scrubs and trees
Rubiaceae	Stipularia africana	riparian & swamps	non-arboreal	0.0689022	0	0.0459667	0	0.0311555		Aloe	0.0512763	0.33615	0.170085	0.0446638	mountainous herbs, scrubs and trees
Lycopodiaceae	Lycopodium pp	mountainous	fern	0.450674	0.103541	0.196466	0.381987	0.0296761		Stipularia africana	0	0.105069	0.0396683	0.0384983	riparian and swamp plants
Anemiaceae	Anemia type	forest	fern	0.34001	0.263155	0.0675858	0.276278	0.0215649		Hyphaene	0.0661704	0.213269	0.0733958	0.0353607	woodland trees and scrubs
E-Woodland
Euphorbiaceae	Alchornea	forest	arboreal	0	0.987041	2.23741	0.55364	0.405828		EM3
Dennstaedtiaceae	Pteridium type		fern	0	0.200889	1.14165	0.230499	0.373912		Amaranthaceae	0.122477	0.740707	2.16541	0.468842	coastal and halophytic scrubs and herbs
Fabaceae	Burkea africana	woodland	arboreal	0	0	0.495239	0.371602	0.221172		Alchornea	0.890936	0.0320155	3.69462	0.46784	woodland trees and scrubs
Clusiaceae	Garcinia ovalifolia type	forest	arboreal	0	0.023619	0.300799	0.066749	0.2197		Poaceae	7.62879	14.0398	19.5345	0.422665
Oleaceae	Schrebera type	woodland	arboreal	0	0.0275036	0.488568	0	0.208876		Asteraceae Tubuliflorae	0.502322	4.30348	4.3517	0.309034	Asteraceae
Sapotaceae	Manilkara	woodland	arboreal	0	0.00940273	0.535822	0.373339	0.180815		Cotula type	0	0.102235	0.683577	0.292934	Asteraceae
Fabaceae	Cassia type	woodland	arboreal/non-arboreal	0	0.530355	0.768159	0.138254	0.170274		Combretaceae pp	0.203512	0.143837	1.13926	0.232958	woodland trees and scrubs
Rhizophoraceae	Rhizophoraceae	mangrove	arboreal	0	0.27711	0.75826	0.426811	0.170258		Khaya	0.0270668	0	0.510662	0.209804	forest trees
Euphorbiaceae	Euphorbia type 2		arboreal/non-arboreal	0.0426162	0.766012	0.903151	0.0933629	0.169275		Daniellia type	0.108143	0	0.417536	0.199875	woodland trees and scrubs
Phyllanthaceae	Hymenocardia	forest	arboreal	0	0	0.351131	0.0877454	0.156549		Pseudolachnostylis type	0.135847	0	0.577631	0.19178	mountainous herbs, scrubs and trees
Chrysobalanaceae	Parinari	woodland	arboreal	0	0.0001444	0.0724381	0	0.148437		Euphorbia type	0.582034	0	1.32446	0.188694	woodland trees and scrubs
Fabaceae	Daniellia type	woodland	arboreal	0	0.100529	0.215346	0.0564045	0.146097		Pentzia type	0	0.770088	1.29776	0.183678	Asteraceae
Euphorbiaceae	Spirostachys	woodland	arboreal	0	0.886799	1.19601	0.270244	0.142422		Balanites	0.0807224	0.0768737	0.731353	0.180747	woodland trees and scrubs
Meliaceae	Khaya	forest	arboreal	0	0.0568701	0.246829	0.00419128	0.1421		Burkea africana	0.463928	0	0.664802	0.177544	woodland trees and scrubs
Phyllanthaceae	Pseudolachnostylis type	woodland	arboreal	0	0.280761	0.39243	0.122583	0.137715		Spirostachys + Euphorbia tye 2	1.24063	0.0630332	2.65345	0.170901	forest trees
Asteraceae	Tarchonanthus-Artemisia type	woodland	arboreal	0.189403	0.261415	0.563655	0	0.135367		Chrysophyllum	0	0.0738412	0.248477	0.156748	forest trees
Pteridophyta	monolete psilate spores		fern	2.14732	4.02269	5.77141	5.3126	0.125872		Rhizophoraceae	0.822538	0	1.11449	0.144483	mangrove tree
Aizoaceae	Aizoaceae	coastal	arboreal/non-arboreal	0	0.223691	0.713875	0.220049	0.124684		Schrebera type	0.270517	0	0.64625	0.142716	woodland trees and scrubs
Combretaceae	Combretaceae pp	woodland	arboreal	0	0.373831	0.62304	0.108038	0.11791		Manilkara	0.583986	0	0.612926	0.134667	woodland trees and scrubs
Fabaceae	Fabaceae pp	woodland	arboreal/non-arboreal	0	0.0990736	0.308167	0.0785615	0.11587		Spermacoce	0.0407769	0	0.274799	0.130697	woodland trees and scrubs
Rhamnaceae	Rhamnaceae pp	coastal	arboreal	0	0.0911048	0.224693	0.044493	0.106838		Brachystegia	0.0140581	0.114538	0.734385	0.127702	woodland trees and scrubs
Fabaceae-Faboideae	Indigofera type	woodland	arboreal/non-arboreal	0	0.20167	0.255677	0.0876801	0.0967828		Lannea type	0.0268141	0	0.3602	0.123648	woodland trees and scrubs
Fabaceae	Brachystegia	woodland	arboreal	0	0.190424	0.488853	0.00179434	0.0847241		Dodonaea viscosa	0.265011	0.0900417	0.77334	0.110084	woodland trees and scrubs
Polypodiaceae	Polypodiaceae	forest	fern	0.0990015	0.745848	1.12766	0.781985	0.0813972		Acanthaceae pp	0.0603439	0	0.261376	0.0927927	woodland trees and scrubs
Primulaceae	Myrsine africana	mountainous	arboreal	0	0.890055	1.09429	0.821646	0.074562		Fabaceae pp	0.182459	0	0.498514	0.088622	woodland trees and scrubs
Rubiaceae	Spermacoce	woodland	arboreal/non-arboreal	0	0.0791314	0.125202	0	0.0580263		Cassia type	0.431344	0	1.03519	0.0793763	woodland trees and scrubs
Rubiaceae	Coffea type	woodland	arboreal	0.0345192	0	0.097999	0	0.0562088		Anthospermum	0.266722	0.286417	0.881763	0.0742068	mountainous herbs, scrubs and trees
Fabaceae-Faboideae	Pterocarpus type	woodland	arboreal	0.0132381	0.0438093	0.256001	0.130782	0.0562035		Cleome	0.0732762	0	0.0737594	0.0651036	woodland trees and scrubs
Anacardiaceae	Lannea type	woodland	arboreal	0	0.120819	0.172976	0.0109631	0.0514186		Aizoaceae	0.795072	0	0.818496	0.0620811	coastal and halophytic scrubs and herbs
Sapotaceae	Chrysophyllum	forest	arboreal	0	0.0785374	0.125041	0	0.0498901		Garcinia ovalifolia type	0.256928	0	0.262307	0.0574783	forest trees
Xanthorrhoeaceae	Aloe	mountainous	non-arboreal	0.184952	0.0373402	0.226038	0.00829197	0.0462976		Rubiaceae pp	0.0441303	0	0.131195	0.0525699	woodland trees and scrubs
Fabaceae-Faboideae	Millettia	forest	arboreal	0	0.00945269	0.0593869	0.0104449	0.0454133		Indigofera type	0.148222	0.0389242	0.303329	0.0509277	woodland trees and scrubs
Plantaginaceae	Plantago		non-arboreal	0.00395724	0.0746617	0.0943626	0	0.0433516		Crotalaria	0.109795	0	0.163052	0.0486383	forest trees
Proteaceae	Protea type	mountainous	arboreal	0.00331215	0.028853	0.1287	0.0500848	0.0367316		Parinari	0.0435836	0	0.082842	0.0472632	woodland trees and scrubs
Caryophyllaceae	Caryophyllaceae	coastal	arboreal/non-arboreal	0.0823797	0.168266	0.180708	0	0.0357979		Celastraceae	0	0.0233706	0.0941191	0.0419469	forest trees
Rubiaceae	Rytigynia-Fadogia type	coastal	arboreal/non-arboreal	0	0.0337901	0.0513839	0.00045415	0.0311296		Pteris	0.476033	0.134901	0.486734	0.0417904	riparian and swamp plants
Sapindaceae	Dodonaea viscosa	woodland	arboreal	0	0.414864	0.429841	0.341562	0.0248146		Tribulus	0.027658	0.189643	0.274295	0.0359759	coastal and halophytic scrubs and herbs
Cupressaceae	Juniperus	mountainous	arboreal	0.0393782	0.0158488	0.10078	0	0.0192011		Protea type	0.139713	0	0.195936	0.0334307	mountainous herbs, scrubs and trees
Fabaceae-Faboideae	Baphia	forest	arboreal	0.00962671	0	0.0311982	0.0042337	0.0175244
E-Shrubland
Asteraceae	Asteraceae Tubuliflorae		arboreal/non-arboreal	3.47779	6.2004	2.49114	0.695896	0.403214
Amaranthaceae	Amaranthaceae	halophil	arboreal/non-arboreal	0.637916	1.85724	1.08126	0.00904403	0.373896
Asteraceae	Cotula type		non-arboreal	0.0201638	0.74216	0.30482	0	0.274133
Poaceae	Poaceae		non-arboreal	13.6242	13.8162	12.8981	6.11238	0.269022
Asteraceae	Pentzia type		non-arboreal	0.433564	1.52414	0.607189	0	0.242291
Euphorbiaceae	Euphorbia type	woodland	arboreal/non-arboreal	0	1.15014	0.767354	0.306274	0.213469
Acanthaceae	Justicia type		arboreal/non-arboreal	0.0207886	0.211569	0	0	0.212439
Asteraceae	Daisy type		non-arboreal	0.765794	1.33402	0.546071	0	0.191227
Zygophyllaceae	Tribulus	halophil	non-arboreal	0.0662357	0.549286	0.216881	0	0.18519
Buxaceae	Buxus hildebrandtii type	forest	arboreal	0.161473	1.13766	0	0.0316187	0.165321
Acanthaceae	Acanthaceae pp	woodland	arboreal/non-arboreal	0.0404679	0.438226	0.048605	0	0.161132
Fabaceae-Mimosoideae	Acacia	woodland	arboreal	0.169376	0.728724	0.0221798	0.176782	0.15075
Zygophyllaceae	Balanites	woodland	arboreal	0	0.502118	0.376982	0.0860063	0.139721
Myristicaceae	Pycnanthus	forest	arboreal	0	0.100477	0	0	0.121638
Acanthaceae	Hypoestes-Dicliptera type	woodland	arboreal/non-arboreal	0.109316	0.350285	0	0.0278473	0.120044
Asteraceae	Gazania type	halophil	arboreal/non-arboreal	0.120126	0.338781	0.00783357	0	0.109777
Buxaceae	Buxus macowani type	coastal	arboreal	0	2.18481	0.891786	1.52305	0.108428
Fabaceae	Peltophorum africanum	woodland	arboreal	0	0.16307	0.0492006	0.0946419	0.107393
Meliaceae-Sapotaceae	Meliaceae-Sapotaceae	forest	arboreal	0.0266986	0.798613	0.623345	0.343094	0.0916292
Asteraceae	Centaurea	woodland	arboreal	0	0.200153	0	0	0.0832748
Burseraceae	Commiphora	coastal	arboreal	0	0.151912	0.0499613	0.0352181	0.082555
Ricciaceae	Riccia type		moss	0.139521	0.679283	0.0754522	0.199659	0.0784902
Asteraceae	Asteraceae Vernoniae		arboreal/non-arboreal	0.220018	0.369809	0	0.135117	0.0764765
Combretaceae	Lumnitzera type	mangrove	arboreal	0	0.187425	0.0447653	0.0601026	0.0646158
Buxaceae	Buxus madagascaria type	woodland	arboreal	0.0292325	0.31952	0.0637466	0.0662418	0.0538205
Fabaceae	Colophospermum mopane	woodland	arboreal	0	0.103122	0	0.0393585	0.0533984
Liliaceae	Liliaceae		non-arboreal	0.0985158	0.111811	0	0	0.0531963
Pandanaceae	Pandanus		arboreal	0.0218095	0.0571682	0.00702112	0	0.0432749
Capparaceae	Cleome	woodland	non-arboreal	0	0.0599397	0.0444899	0.016516	0.0423651
Sapindaceae	Blighia type	forest	arboreal	0	0.0836609	0.0642492	0.0267328	0.0415906
Malvaceae	Corchorus		arboreal/non-arboreal	0	0.0856501	0	0.0313316	0.0408745
Zygophyllaceae	Zygophyllum	halophil	non-arboreal	0	0.0732093	0.00570626	0.0136865	0.0375097
Rosaceae	Cliffortia	mountainous	arboreal	0.0916073	0.120815	0	0.0935528	0.0364778
Rubiaceae	Anthospermum	mountainous	arboreal/non-arboreal	0.645085	0.671144	0.464936	0.207969	0.0343211
Celastraceae	Celastraceae	forest	arboreal	0.00799033	0.0903737	0.0712246	0	0.0330505
Geraniaceae	Pelargonium type		non-arboreal	0.00299574	0.0950671	0	0.019625	0.0313027
Capparaceae	Boscia-Maerua type	coastal	arboreal	0.00850975	0.156196	0.13627	0.0735909	0.0303717
Fabaceae-Faboideae	Rhynchosia	woodland	non-arboreal	0	0.0681833	0	0.0395966	0.0241535
Malvaceae	Dombeya	woodland	arboreal	0.00637917	0.128367	0.0930233	0.0204937	0.0227999
Arecaceae	Hyphaene	woodland	arboreal	0.0476206	0.268902	0.108878	0.101195	0.0217426
Rhamnaceae	Ziziphus type	woodland	arboreal	0	0.107743	0.04165	0.0670655	0.0216407
Commelinaceae	Commelinaceae		non-arboreal	0	0.0656185	0.0128439	0.0276686	0.0210943
Polygonaceae	Persicaria senegalensis type	riparian & swamps	non-arboreal	0	0.106511	0.0406278	0.0504657	0.0196751
Rosaceae	Alchemilla	mountainous	arboreal/non-arboreal	0.0101496	0.0511908	0.00719919	0.00656263	0.0184578
